# Supplementary material
Source: PubMed Central journal article supplement (PMC1373682)

### **Supplemental Figure 1. Transgene expression and protein levels in BRI-A $\beta$ mice.**

Expression patterns were identical in BRI-A $\beta$ 42 (A) and BRI-A $\beta$ 40 (B) transgenic mice as assessed by *in situ* hybridization. BRI-A $\beta$  mRNA was expressed in a pattern characteristic of the MoPrP promoter, with highest expression in the granular cell layers of the cerebellum and the hippocampus. (C) Northern blots of total RNA indicated that the fusion transgene transcript was expressed at levels approximating endogenous mouse APP mRNA expression (BRI-A $\beta$ 42A) or at approximately half the level of endogenous mouse APP expression (BRI-A $\beta$ 42B). The BRI-A $\beta$ 40 line expressed the transgene at greater levels than the BRI-A $\beta$ 42 mice. Northern blots were stripped and reprobed with histone cDNA to assess loading. Human APP protein was detected in Tg2576 (arrow) when Western blots were probed with either (D) 6E10 (anti-A $\beta$  1-16) or (E) Bam-10 (anti-A $\beta$ 1-10), a smaller full-length fusion BRI-A $\beta$  protein (~ 37kDa) was detected in the BRI-A $\beta$  lines (arrow head). Protein levels were highest in BRI-A $\beta$ 40 > BRI-A $\beta$ 42A > BRI-A $\beta$ 42B. Two non-specific bands (\*), which were detected by secondary antibody alone, were present at 52kDa and 40kDa. Processed 4kDa A $\beta$  species were detected by immunoprecipitation (IP) western in the BRI-A $\beta$  mice (F). 3160 (anti-A $\beta$  polyclonal antibody) was used to IP the A $\beta$  peptide and 6E10 (anti-A $\beta$ 1-16) was used for detection. Tg2576 and A $\beta$  peptide (45fg) samples were used as positive controls and non transgenic extracts as a negative control. Mass spectroscopy was used to definitively identify the 4kDa A $\beta$  isoforms in the BRI-A $\beta$  mice (see Fig.1).

A

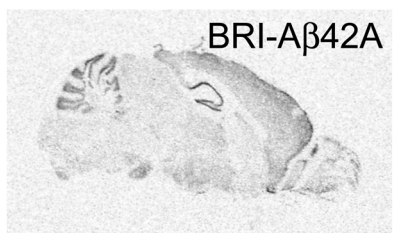

B

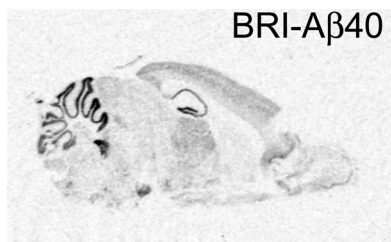

C

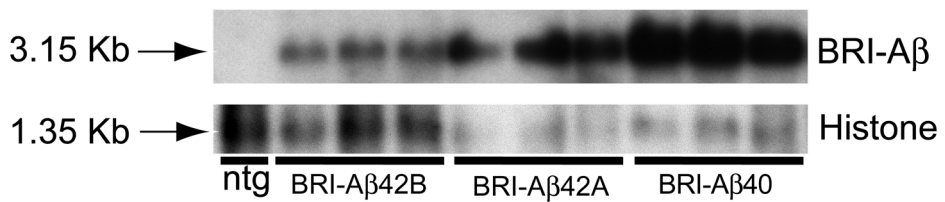

D

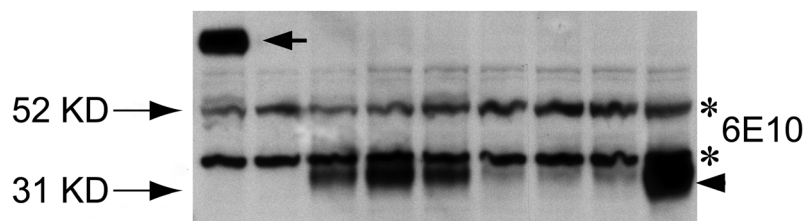

E

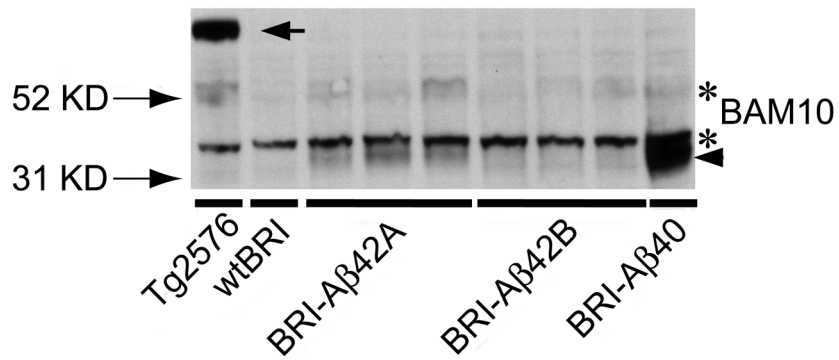

F

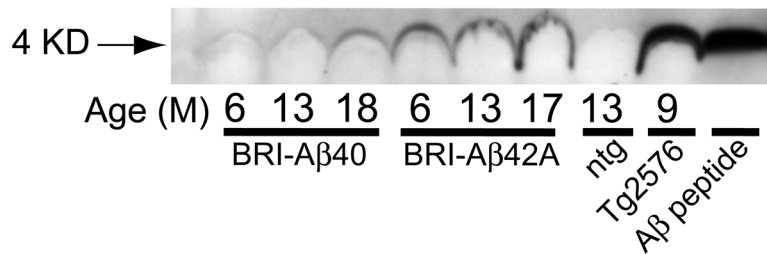

**Supplemental Figure 2. Full-length BRI-A $\beta$  protein levels are unaltered by age.**

Neither age nor amyloid deposition (in BRI-A $\beta$ 42 mice) altered full-length BRI-A $\beta$  transgenic protein levels (37kDa) in the brains of both BRI-A $\beta$ 40 and BRI-A $\beta$ 42 mice. Blots were probed with 6E10, anti-total A $\beta$ , then stripped and reprobed with anti- $\beta$  actin to assess loading. Tg2576 and non- transgenic protein extracts were run as positive and negative controls respectively.

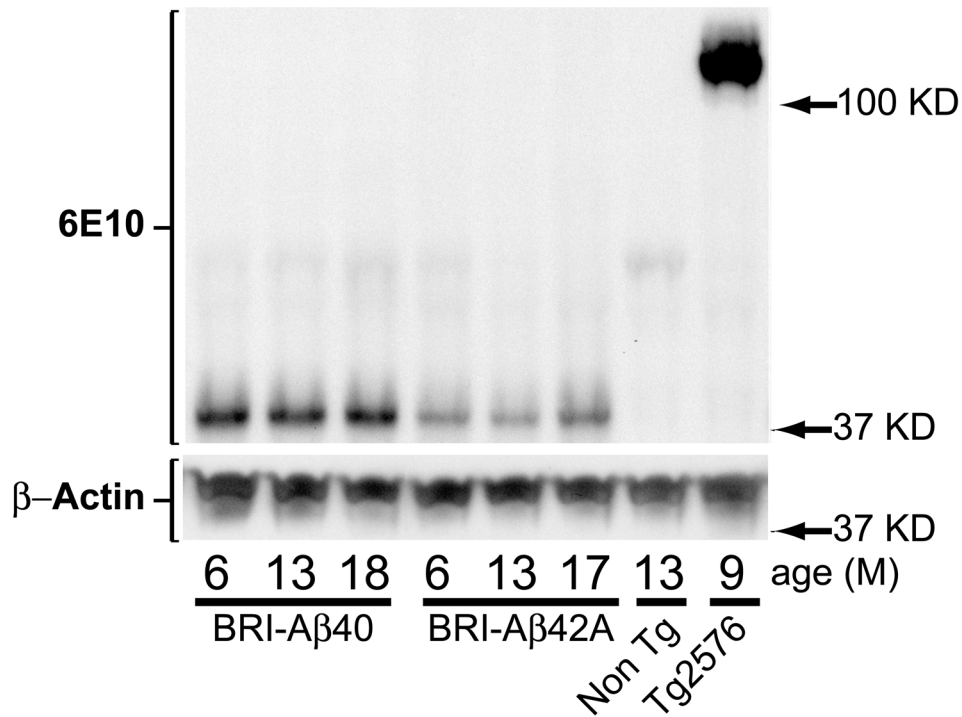

**Supplemental Figure 3. Plasma A $\beta$ 40 and A $\beta$ 42 levels in BRI-A $\beta$  mice.**

Both A $\beta$ 40 and A $\beta$ 42 was readily detected from 3 months onwards in plasma from BRI-A $\beta$ 40 and BRI-A $\beta$ 42 mice respectively. No A $\beta$ 42 was detected in BRI-A $\beta$ 40 mice and similarly no A $\beta$ 40 was present in plasma from BRI-A $\beta$ 42 mice.

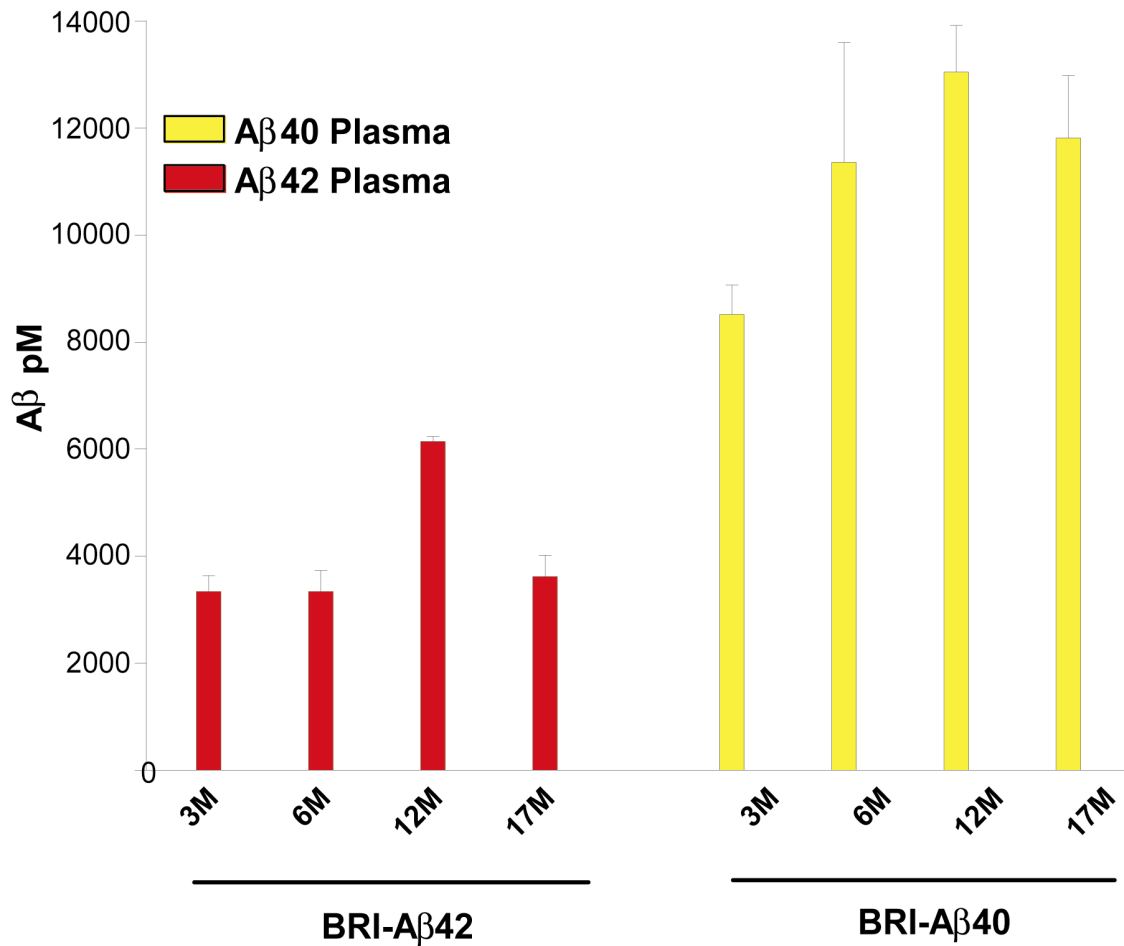

**Supplemental Figure 4. Similar forebrain A $\beta$  pathology in BRI-A $\beta$ 42 and Tg2576 mice**

Hippocampal sections from 17 month old BRI-A $\beta$ 42 mice (A) and Tg2576 mice expressing mutant APP<sub>swe</sub> (B) immunostained with an antibody raised against total A $\beta$ . Both the BRI-A $\beta$ 42 and Tg2576 mice have extensive amyloid deposition within the hippocampal formation, however, the A $\beta$  plaques tended to be smaller and more numerous in the BRI-A $\beta$ 42 mice. Additionally, the BRI-A $\beta$ 42 mice had more diffuse A $\beta$  immunoreactivity compared with Tg2576. Scale bar = 300 $\mu$ m.

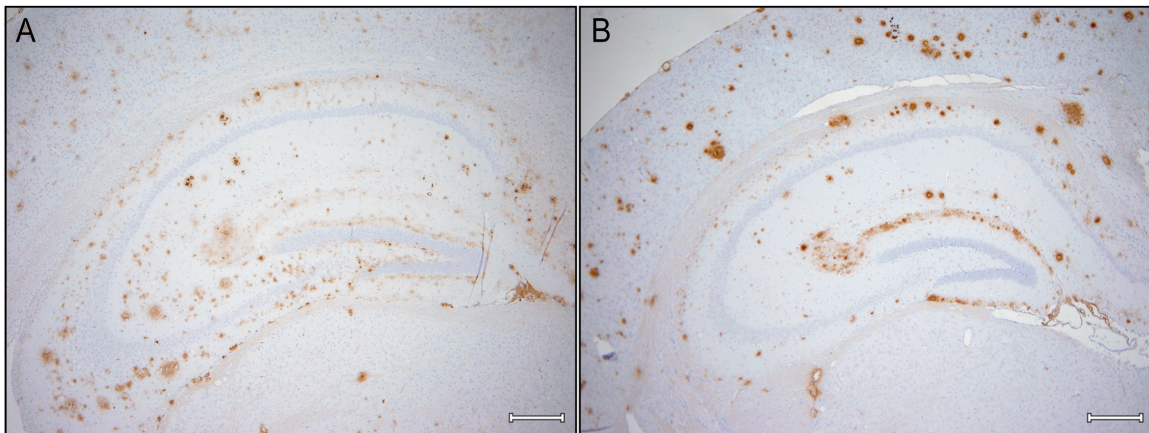

### Supplemental Figure 5. RIPA and plasma A $\beta$ levels in BRI-A $\beta$ 42 x Tg2576

transgenic mice.

At 6 months of age, an age prior to forebrain deposition in either Tg2576 or BRI-A $\beta$ 42A mice, the levels of RIPA extractable A $\beta$ 40 and A $\beta$ 42 (A) and plasma A $\beta$ 40 and A $\beta$ 42 levels (B) in the bigenic BRI-A $\beta$ 42/Tg2576 mice were consistent with an additive sum of A $\beta$  levels of their singly transgenic littermates. Both sets of data suggest that there was no increased A $\beta$  or APP production in the bigenic BRI-A $\beta$ 42/Tg2576 mice.

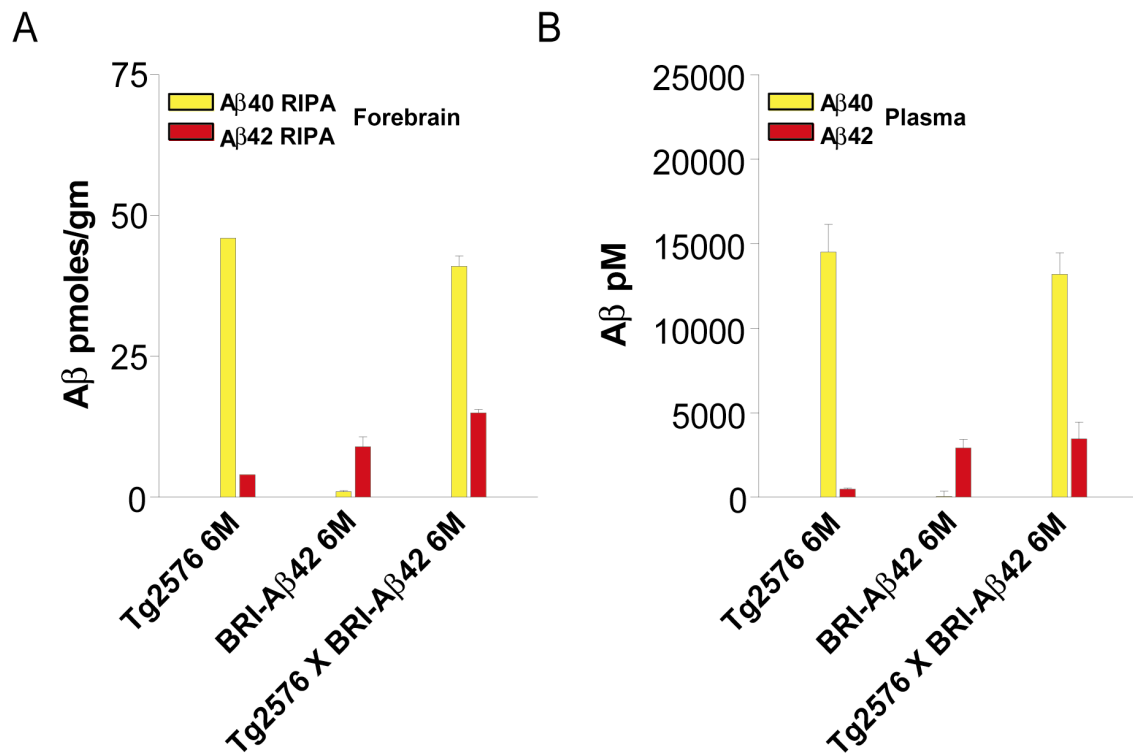

Supplement: NIHMS7089-supplement-Supplemental.pdf [file NIHMS7089-supplement-Supplemental.pdf]
